# Supplementary material for: How patient-generated health data and patient-reported outcomes affect patient–clinician relationships: A systematic review
Source: PubMed Central journal article supplement — Health Informatics J. Author manuscript; Available in PMC 2022 Apr 6. (PMC8986320; doi:10.1177/1460458220928184), 2020-06-20
Supplement: NIHMS1693929-supplement-Appendix.pdf [file NIHMS1693929-supplement-Appendix.pdf]

## Appendix

Systematic review research database queries.

| Database | Search Terms                                                                                                                                                                                                                                                                                                                                                                                                                                                                                                                                                                                                                                                                                                                                                                                                                                                                                                                                                                                                                                                                                                                                                                                                                                                                                                                                                                                                                                                                                                                                                 |
|----------|--------------------------------------------------------------------------------------------------------------------------------------------------------------------------------------------------------------------------------------------------------------------------------------------------------------------------------------------------------------------------------------------------------------------------------------------------------------------------------------------------------------------------------------------------------------------------------------------------------------------------------------------------------------------------------------------------------------------------------------------------------------------------------------------------------------------------------------------------------------------------------------------------------------------------------------------------------------------------------------------------------------------------------------------------------------------------------------------------------------------------------------------------------------------------------------------------------------------------------------------------------------------------------------------------------------------------------------------------------------------------------------------------------------------------------------------------------------------------------------------------------------------------------------------------------------|
| PubMed   | (("patient generated health data" OR "patient generated data" OR "person-generated health data" OR "person generated health data" OR ("patient generated" AND data) OR "ubiquitous health" OR "pervasive health" OR "quantified self" OR "patient reported outcome" OR "patient reported outcomes" OR "patient outcome assessment"[mesh] OR "Nurse-Patient Relations"[mesh] OR "Physician-Patient Relations"[mesh] OR "Professional-Patient Relations"[Mesh:NoExp] OR "patient provider" OR "doctor patient" OR "patient doctor" OR "patient physician" OR "physician patient" OR "nurse patient" OR "patient nurse" OR "patient surgeon" OR "surgeon patient") AND ("communication"[mesh] OR communication OR communicating OR communicate*) AND ("Conflict (Psychology)"[mesh] OR consensus[mesh] OR discord* OR concord* OR disaccord OR disagree* OR dissiden* OR dissonan* OR friction OR agree* OR consensus OR compromis*) AND ("clinical decision making"[mesh] OR "clinical decision making" OR "patient acceptance of health care"[mesh] OR "primary health care"[mesh] OR "patient care"[mesh] OR "perioperative care"[mesh] OR "primary care" OR "patient care" OR "perioperative care" OR "postacute care" OR "post-acute care" OR "Surgical Procedures, Operative"[Mesh] OR surgery OR surgical OR surgeries OR "specialties, surgical"[mesh])) NOT ("language"[mesh] OR "translations"[mesh] OR language*[ti] OR translator*[ti] OR interpreter*[ti] OR gender[ti] OR race[ti]) AND ("2006"[Date - Publication] : "2017"[Date - Publication]) |

|        |                                                                                                                                                                                                                                                                                                                                                                                                                                                                                                                                                                                                                                                                                                                                                                                                                                                                                                                                                                                                                                                                                                                                                                                                                                                                                                                                                                                                |
|--------|------------------------------------------------------------------------------------------------------------------------------------------------------------------------------------------------------------------------------------------------------------------------------------------------------------------------------------------------------------------------------------------------------------------------------------------------------------------------------------------------------------------------------------------------------------------------------------------------------------------------------------------------------------------------------------------------------------------------------------------------------------------------------------------------------------------------------------------------------------------------------------------------------------------------------------------------------------------------------------------------------------------------------------------------------------------------------------------------------------------------------------------------------------------------------------------------------------------------------------------------------------------------------------------------------------------------------------------------------------------------------------------------|
| Embase | (("patient generated health data" OR "patient generated data" OR "person-generated health data" OR "person generated health data" OR ("patient generated" AND data) OR "ubiquitous health" OR "pervasive health" OR "quantified self" OR "patient reported outcome" OR "patient reported outcomes" OR 'nurse patient relationship'/exp OR 'doctor patient relation'/exp OR 'human relation'/de OR "patient provider" OR "doctor patient" OR "patient doctor" OR "patient physician" OR "physician patient" OR "nurse patient" OR "patient nurse" OR "surgeon patient" OR "patient surgeon") AND ('interpersonal communication'/exp OR communication OR communicating OR communicate*) AND ('conflict'/exp OR 'consensus'/exp OR discord* OR concord* OR disaccord OR disagree* OR dissiden* OR dissonan* OR friction OR agree* OR consensus OR compromis*) AND ('clinical decision making'/exp OR 'patient attitude'/exp OR 'patient decision making'/exp OR 'primary health care'/exp OR 'patient care'/exp OR 'perioperative period'/exp OR 'postoperative period'/exp OR 'surgery'/exp OR 'intensive care'/exp OR "clinical decision making" OR "primary care" OR "patient care" OR "perioperative care" OR "postacute care" OR "post-acute care")) NOT ('language'/exp OR language*:ti OR translator*:ti OR translation*:ti OR interpreter*:ti OR gender:ti OR race:ti) AND [2006-2017]/py |
|--------|------------------------------------------------------------------------------------------------------------------------------------------------------------------------------------------------------------------------------------------------------------------------------------------------------------------------------------------------------------------------------------------------------------------------------------------------------------------------------------------------------------------------------------------------------------------------------------------------------------------------------------------------------------------------------------------------------------------------------------------------------------------------------------------------------------------------------------------------------------------------------------------------------------------------------------------------------------------------------------------------------------------------------------------------------------------------------------------------------------------------------------------------------------------------------------------------------------------------------------------------------------------------------------------------------------------------------------------------------------------------------------------------|

|                                 |                                                                                                                                                                                                                                                                                                                                                                                                                                                                                                                                                                                                                                                                                                                                                                                                                                                                                                                                                                                                                                                                                                                                                                                                                                                                                                                                                                                                                                                                                                                                                                                                                                                                                                                                                                                                                                                                                                                                    |
|---------------------------------|------------------------------------------------------------------------------------------------------------------------------------------------------------------------------------------------------------------------------------------------------------------------------------------------------------------------------------------------------------------------------------------------------------------------------------------------------------------------------------------------------------------------------------------------------------------------------------------------------------------------------------------------------------------------------------------------------------------------------------------------------------------------------------------------------------------------------------------------------------------------------------------------------------------------------------------------------------------------------------------------------------------------------------------------------------------------------------------------------------------------------------------------------------------------------------------------------------------------------------------------------------------------------------------------------------------------------------------------------------------------------------------------------------------------------------------------------------------------------------------------------------------------------------------------------------------------------------------------------------------------------------------------------------------------------------------------------------------------------------------------------------------------------------------------------------------------------------------------------------------------------------------------------------------------------------|
| <p>PsycINFO</p>                 | <p>("patient generated health data" OR "patient generated data" OR "person-generated health data" OR "person generated health data" OR ("patient generated" AND data) OR "patient reported outcome" OR "patient reported outcomes" OR "ubiquitous health" OR "quantified self" OR "pervasive health" OR "patient provider" OR "doctor patient" OR "patient doctor" OR "patient physician" OR "physician patient" OR "nurse patient" OR "patient nurse" OR "surgeon patient" OR "patient surgeon")<br/> AND<br/> (DE "Communication" OR DE "Electronic Communication" OR DE "Interpersonal Communication" OR DE "Verbal Communication" OR communication OR communicating OR communicate*)<br/> AND<br/> (DE "Conflict" OR DE "Arguments" OR discord* OR concord* OR disaccord OR disagree* OR dissiden* OR dissonan* OR friction OR agree* OR consensus OR compromis*)<br/> AND<br/> (DE "Decision Making" OR DE "Choice Behavior" OR DE "Compliance" OR DE "Treatment Compliance" OR DE "Client Attitudes" OR DE "Client Satisfaction" OR DE "Client Participation" OR DE "Primary Health Care" OR DE "Treatment Planning" OR DE "Caring Behaviors" OR DE "Discharge Planning" OR DE "Postsurgical Complications" OR DE "Surgery" OR DE "Surgeons" OR DE "Surgical Patients" OR "clinical decision making" OR "primary care" OR "patient care" OR "perioperative care" OR "postacute care" OR "post acute care" OR surgery OR surgical OR surgeries)<br/> NOT<br/> (DE "Language" OR DE "Dialect" OR DE "Figurative Language" OR DE "Foreign Languages" OR DE "Form Classes (Language)" OR DE "Native Language" OR DE "Natural Language" OR DE "Phrases" OR DE "Profanity" OR DE "Rhetoric" OR DE "Sentences" OR DE "Sign Language" OR DE "Spelling" OR DE "Vocabulary" OR DE "Written Language" OR DE "Foreign Language Translation" OR DE "Interpreters" OR TI (language* OR translator* OR interpreter* OR gender OR race))</p> |
| <p>IEEE</p>                     | <p>((patient generated health data) OR (patient generated data) OR (person generated health data) OR (person-generated health data) OR (ubiquitous health) OR (pervasive health) OR (quantified self))<br/> AND communication AND ((conflict OR consensus) AND (surgery OR (primary care))) OR (patient reported outcome) OR (patient reported outcomes))</p>                                                                                                                                                                                                                                                                                                                                                                                                                                                                                                                                                                                                                                                                                                                                                                                                                                                                                                                                                                                                                                                                                                                                                                                                                                                                                                                                                                                                                                                                                                                                                                      |
| <p>ACM (via Google Scholar)</p> | <p>site:http://dl.acm.org ("patient generated health data" OR "patient generated data" OR "person generated health data" OR "person-generated health data") OR ("ubiquitous health" OR "pervasive health" OR "quantified self") OR ("patient reported outcome" OR "patient reported outcomes") AND (communication) AND (conflict OR consensus) AND (surgery OR "primary care")</p>                                                                                                                                                                                                                                                                                                                                                                                                                                                                                                                                                                                                                                                                                                                                                                                                                                                                                                                                                                                                                                                                                                                                                                                                                                                                                                                                                                                                                                                                                                                                                 |
